# Supplementary material
Source: PubMed Central journal article supplement (PMC4459129)
Supplement: NIHMS695411-supplement-Supplemental_Data.pdf [file NIHMS695411-supplement-Supplemental_Data.pdf]

Rapid mitochondrial dysfunction mediates TNF-alpha induced neurotoxicity

Danielle N. Doll, Stephanie L. Rellick, Taura L. Barr, Xuefang Ren, James W. Simpkins

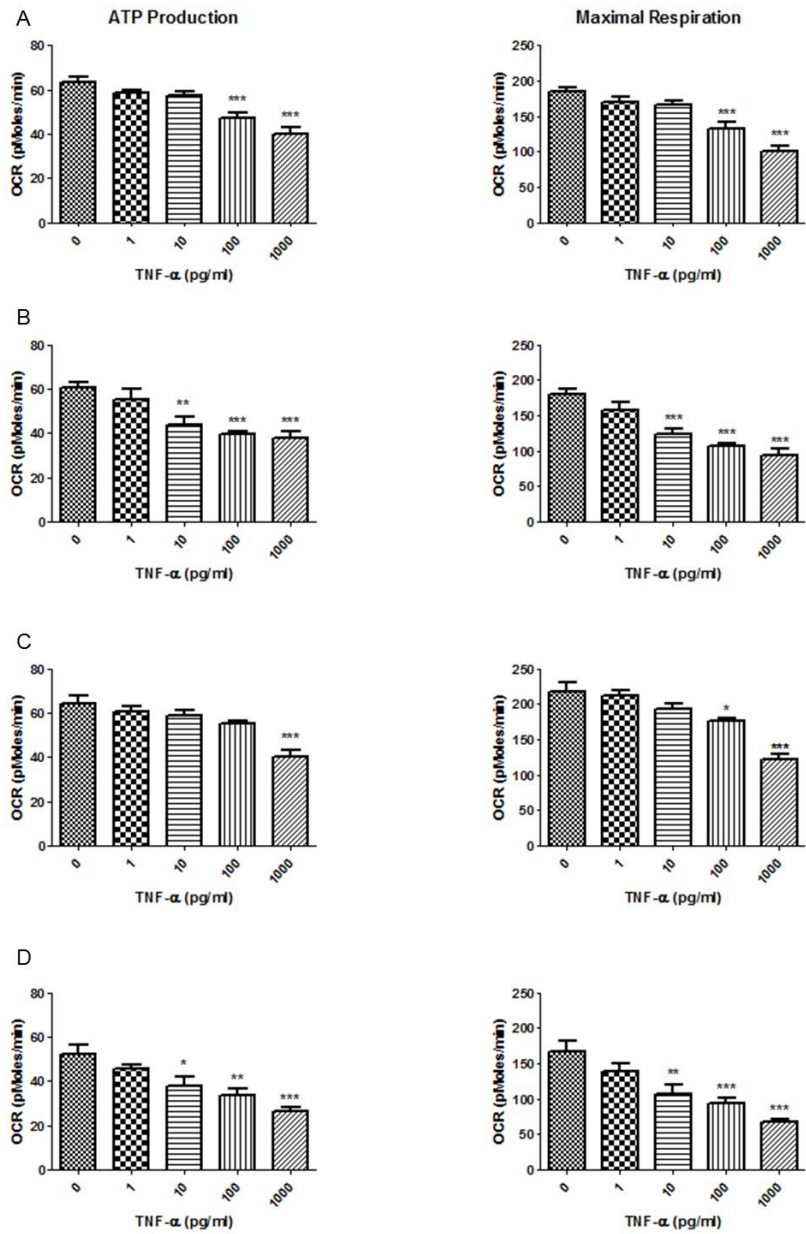

Supplemental Figure 1: Effects of TNF- $\alpha$  on ATP production and maximal respiration. (A) Exposure to TNF- $\alpha$  for 1.5 hours. (B) Exposure to TNF- $\alpha$  for 3 hours. (C) Exposure to TNF- $\alpha$  for 6 hours. (D) Exposure to TNF- $\alpha$  for 12 hours. Analysis of variance and Dunnett post-hoc tests were used to assess significance. \*  $p < 0.05$ ; \*\*  $p < 0.01$ ; \*\*\*  $p < 0.001$ . Depicted are mean + SEM for  $n = 6$ /group.

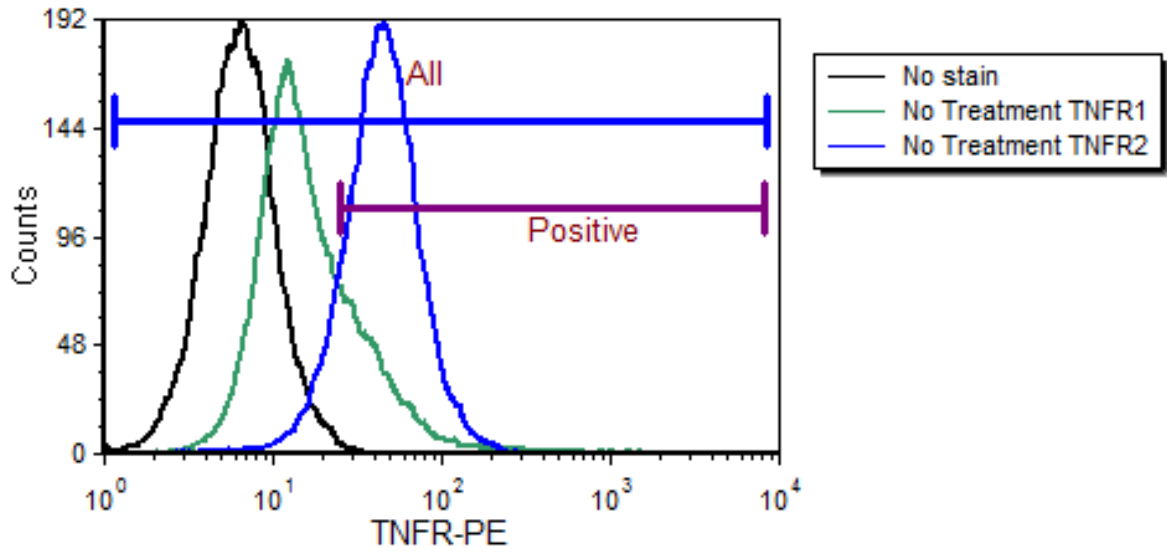

Supplemental Figure 2: Flow cytometry analysis of HT-22 cell expression of TNF-R1 and TNF-R2.

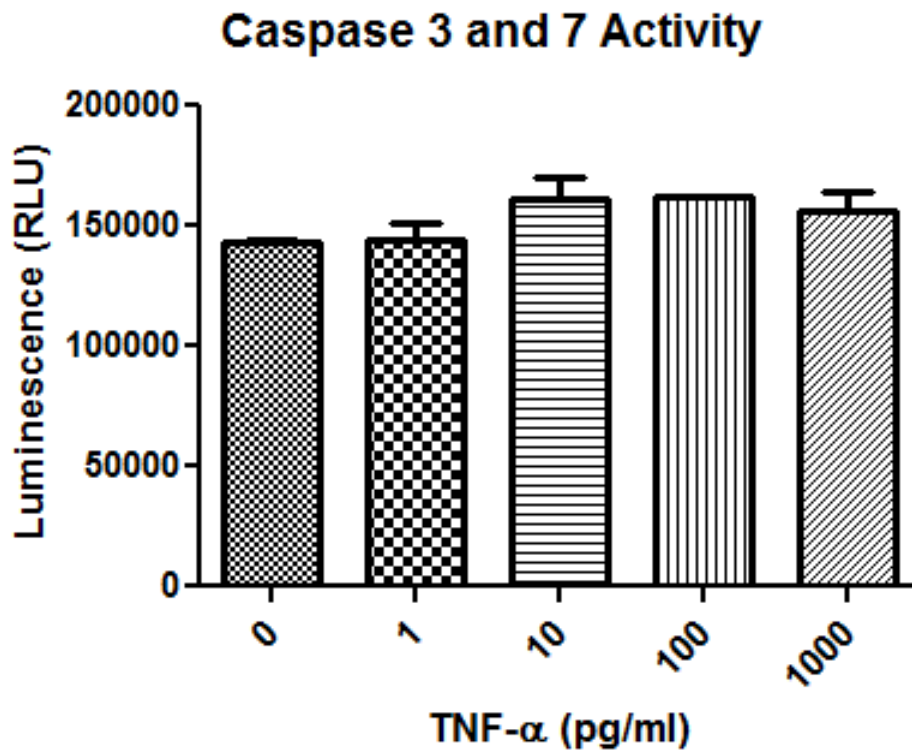

Supplemental Figure 3: Effects of 1.5 hours of exposure to TNF- $\alpha$  on caspase 3/7 activity.

Analysis of variance did not show a significant difference among the groups. Depicted are mean + SEM for n = 6/group. When SEM is not depicted, it is too small for representation.
